# Supplementary material
Source: PubMed Central journal article supplement (PMC7523037)
Supplement: JCP-25-164_Supple.pdf [file JCP-25-164_Supple.pdf]

**Table S1.** Association between exposure or outcome variable and comorbidities<sup>a</sup>

|                      | Comorbidity      |                  |                     |                     |                     |
|----------------------|------------------|------------------|---------------------|---------------------|---------------------|
|                      | Diabetes         | Viral hepatitis  | Liver cirrhosis     | Fatty liver disease | Clonorchis sinensis |
|                      | OR (95% CI)      | OR (95% CI)      | OR (95% CI)         | OR (95% CI)         | OR (95% CI)         |
| Exposure variable    |                  |                  |                     |                     |                     |
| Gallstone            | 2.33 (2.26-3.40) | 2.05 (1.91-2.20) | 4.65 (4.20-5.14)    | 2.40 (2.30-2.52)    | 0.83 (0.39-1.77)    |
| Cholecystectomy      | 2.01 (1.91-2.12) | 1.74 (1.53-1.97) | 2.32 (1.88-2.88)    | 1.93 (1.78-2.10)    | 0.70 (0.17-2.81)    |
| Outcome variable     |                  |                  |                     |                     |                     |
| HBPC                 | 1.39 (1.32-1.64) | 3.64 (3.33-3.98) | 13.17 (12.15-14.28) | 2.34 (1.47-1.73)    | 1.59 (0.77-7.41)    |
| Liver cancer         | 1.45 (1.36-1.54) | 4.98 (4.53-5.48) | 19.04 (17.48-20.74) | 1.72 (1.56-1.89)    | 3.61 (1.17-11.16)   |
| IBDC                 | 1.20 (0.99-1.43) | 1.38 (0.83-2.31) | 1.23 (0.51-2.95)    | 1.97 (1.50-2.60)    | 11.34 (1.60-80.56)  |
| Biliary tract cancer | 1.12 (0.98-1.28) | 1.37 (0.94-1.99) | 2.57 (1.63-4.04)    | 1.22 (0.95-1.56)    | -                   |
| EBDC                 | 1.16 (0.91-1.47) | 1.31 (0.65-2.65) | 3.00 (1.52-6.35)    | 1.33 (0.86-2.05)    | -                   |
| GBC                  | 1.21 (1.03-1.50) | 1.59 (0.95-2.65) | 1.23 (0.46-3.28)    | 1.19 (0.83-1.72)    | -                   |
| AOVC                 | 0.93 (0.61-1.40) | 1.68 (0.62-4.56) | 1.11 (0.16-7.94)    | 0.91 (0.40-2.06)    | -                   |
| Pancreatic cancer    | 1.45 (1.30-1.62) | 0.98 (0.67-1.42) | 2.44 (1.63-3.65)    | 1.45 (1.19-1.76)    | -                   |

HBPC, hepatobiliary and pancreatic cancer; IBDC, intrahepatic bile duct cancer; EBDC, extrahepatic bile duct cancer; GBC, gallbladder cancer, AOVC, ampulla of Vater cancer. <sup>a</sup>Adjusted for sex, age.

**Table S2.** HR of hepatobiliary and pancreatic cancer in the gallstone and cholecystectomy group by sex

| Lag period             | Person-years | Hepatobiliary and pancreatic cancer |                          | Liver Cancer |                          | Biliary tract cancer |                          | Pancreatic cancer |                          |  |
|------------------------|--------------|-------------------------------------|--------------------------|--------------|--------------------------|----------------------|--------------------------|-------------------|--------------------------|--|
|                        |              | Event                               | HR <sup>a</sup> (95% CI) | Event        | HR <sup>a</sup> (95% CI) | Event                | HR <sup>b</sup> (95% CI) | Event             | HR <sup>c</sup> (95% CI) |  |
| <b>Gallstone</b>       |              |                                     |                          |              |                          |                      |                          |                   |                          |  |
| <b>Male</b>            |              |                                     |                          |              |                          |                      |                          |                   |                          |  |
| No lag period          | 36,755       | 301                                 | 2.07 (1.79-2.39)         | 202          | 2.23 (1.89-2.63)         | 67                   | 2.81 (1.97-3.99)         | 32                | 1.08 (0.67-1.75)         |  |
| 1 year of lag          | 29,362       | 169                                 | 1.74 (1.47-2.06)         | 134          | 2.01 (1.66-2.43)         | 22                   | 1.93 (1.22-3.06)         | 13                | 1.07 (0.36-1.34)         |  |
| 3 year of lag          | 17,591       | 96                                  | 1.52 (1.22-1.90)         | 78           | 1.75 (1.36-2.25)         | 13                   | 1.77 (0.97-3.22)         | 5                 | 1.06 (0.26-1.48)         |  |
| 5 year of lag          | 9,262        | 51                                  | 1.47 (1.09-1.98)         | 41           | 1.73 (1.24-2.41)         | 7                    | 1.46 (0.60-3.52)         | 3                 | 1.02 (0.22-2.07)         |  |
| <b>Female</b>          |              |                                     |                          |              |                          |                      |                          |                   |                          |  |
| No lag period          | 39,445       | 186                                 | 2.22 (1.84-2.68)         | 85           | 2.02 (1.57-2.61)         | 66                   | 3.03 (2.08-4.41)         | 35                | 2.08 (1.38-3.13)         |  |
| 1 year of lag          | 31,870       | 93                                  | 1.89 (1.51-2.35)         | 50           | 1.75 (1.30-2.35)         | 22                   | 2.37 (1.50-3.75)         | 21                | 1.89 (1.18-3.01)         |  |
| 3 year of lag          | 19,511       | 48                                  | 1.45 (1.07-1.97)         | 25           | 1.30 (0.86-1.97)         | 11                   | 1.74 (0.90-3.37)         | 12                | 1.65 (0.88-3.08)         |  |
| 5 year of lag          | 10,617       | 22                                  | 1.08 (0.61-1.59)         | 11           | 1.04 (0.43-1.61)         | 5                    | 1.01 (0.33-3.15)         | 6                 | 1.46 (0.61-3.53)         |  |
| <b>Cholecystectomy</b> |              |                                     |                          |              |                          |                      |                          |                   |                          |  |
| <b>Male</b>            |              |                                     |                          |              |                          |                      |                          |                   |                          |  |
| No lag period          | 20,618       | 115                                 | 1.77 (1.44-2.18)         | 63           | 1.55 (1.18-2.03)         | 38                   | 3.61 (2.40-5.44)         | 14                | 1.39 (0.79-2.46)         |  |
| 1 year of lag          | 16,338       | 68                                  | 1.51 (1.17-1.93)         | 46           | 1.50 (1.11-2.03)         | 13                   | 2.18 (1.23-3.87)         | 9                 | 1.14 (0.57-2.28)         |  |
| 3 year of lag          | 9,594        | 38                                  | 1.14 (0.80-1.63)         | 27           | 1.11 (0.72-1.73)         | 6                    | 1.45 (0.60-3.51)         | 5                 | 1.15 (0.48-2.78)         |  |
| 5 year of lag          | 4,956        | 18                                  | 1.07 (0.66-1.76)         | 10           | 0.98 (0.53-1.82)         | 4                    | 1.60 (0.51-4.98)         | 4                 | 1.26 (0.41-3.91)         |  |
| <b>Female</b>          |              |                                     |                          |              |                          |                      |                          |                   |                          |  |
| No lag period          | 22,225       | 74                                  | 2.36 (1.81-3.08)         | 24           | 1.50 (0.95-2.36)         | 20                   | 2.03 (1.08-3.78)         | 30                | 4.62 (3.14-6.78)         |  |
| 1 year of lag          | 17,818       | 45                                  | 2.11 (1.55-2.87)         | 15           | 1.45 (0.87-2.42)         | 6                    | 1.47 (0.66-3.29)         | 24                | 4.15 (2.66-6.48)         |  |
| 3 year of lag          | 10,702       | 23                                  | 1.80 (1.18-2.74)         | 9            | 1.40 (0.73-2.70)         | 3                    | 0.78 (0.19-3.11)         | 11                | 3.62 (1.99-6.57)         |  |
| 5 year of lag          | 5,662        | 13                                  | 1.48 (0.80-2.77)         | 4            | 1.14 (0.43-3.04)         | 1                    | 0.70 (0.10-4.96)         | 8                 | 2.97 (1.23-7.16)         |  |

HR, hazard ratio. <sup>a</sup>Adjusted diabetes, viral hepatitis, cirrhosis, fatty liver disease. <sup>b</sup>Ajusted liver cirrhosis. <sup>c</sup>Adjusted diabetes, liver cirrhosis.

**Table S3.** HR of hepatobiliary and pancreatic cancer's subsite in the gallstone and cholecystectomy group by sex

| Lag period             | Person-years | Intrahepatic bile duct cancer |                          | Gallbladder cancer |                          | Extrahepatic bile duct cancer |                          | Ampulla of Vater cancer |                          |
|------------------------|--------------|-------------------------------|--------------------------|--------------------|--------------------------|-------------------------------|--------------------------|-------------------------|--------------------------|
|                        |              | Event                         | HR <sup>a</sup> (95% CI) | Event              | HR <sup>b</sup> (95% CI) | Event                         | HR <sup>c</sup> (95% CI) | Event                   | HR <sup>b</sup> (95% CI) |
| <b>Gallstone</b>       |              |                               |                          |                    |                          |                               |                          |                         |                          |
| <b>Male</b>            |              |                               |                          |                    |                          |                               |                          |                         |                          |
| No lag period          | 36,755       | 22                            | 2.59 (1.61-4.17)         | 38                 | 3.35 (2.01-5.58)         | 23                            | 3.24 (1.84-5.71)         | 1                       | 0.74 (0.10-5.29)         |
| 1 year of lag          | 29,362       | 17                            | 2.80 (1.69-4.62)         | 10                 | 1.98 (0.98-4.20)         | 9                             | 2.70 (1.38-5.29)         | 1                       | 0.91 (0.13-6.52)         |
| 3 year of lag          | 17,591       | 8                             | 2.16 (0.97-3.37)         | 5                  | 1.56 (0.58-4.20)         | 6                             | 2.35 (0.96-5.72)         | 1                       | 1.48 (0.21-10.66)        |
| 5 year of lag          | 9,262        | 6                             | 2.93 (0.93-5.59)         | 2                  | 0.71 (0.10-5.05)         | 3                             | 1.67 (0.41-6.75)         | 1                       | 1.70 (0.37-19.43)        |
| <b>Female</b>          |              |                               |                          |                    |                          |                               |                          |                         |                          |
| No lag period          | 39,445       | 19                            | 1.73 (0.86-3.51)         | 46                 | 3.65 (2.26-5.88)         | 9                             | 1.93 (0.79-4.72)         | 6                       | 3.31 (1.03-10.58)        |
| 1 year of lag          | 31,870       | 8                             | 1.84 (0.87-3.90)         | 15                 | 3.41 (1.99-5.84)         | 2                             | 0.46 (0.06-3.26)         | 2                       | 2.65 (0.65-10.86)        |
| 3 year of lag          | 19,511       | 3                             | 1.20 (0.39-3.76)         | 8                  | 2.25 (0.99-5.04)         | 0                             | -                        | 2                       | 4.26 (1.04-17.46)        |
| 5 year of lag          | 10,617       | 3                             | 2.12 (0.68-6.62)         | 3                  | 1.31 (0.37-5.28)         | 0                             | -                        | 1                       | 3.34 (0.82-13.63)        |
| <b>Cholecystectomy</b> |              |                               |                          |                    |                          |                               |                          |                         |                          |
| <b>Male</b>            |              |                               |                          |                    |                          |                               |                          |                         |                          |
| No lag period          | 20,618       | 12                            | 3.08 (1.73-5.49)         | 20                 | 2.89 (1.43-5.86)         | 9                             | 3.35 (1.69-6.62)         | 3                       | 4.10 (0.29-13.04)        |
| 1 year of lag          | 16,338       | 11                            | 3.14 (1.67-5.89)         | 4                  | 1.76 (0.65-4.72)         | 6                             | 2.18 (0.89-5.36)         | 2                       | 3.34 (0.82-13.63)        |
| 3 year of lag          | 9,594        | 9                             | 3.53 (1.67-7.47)         | 1                  | 0.70 (0.10-4.99)         | 4                             | 2.01 (0.63-6.37)         | 0                       | -                        |
| 5 year of lag          | 4,956        | 5                             | 4.61 (1.91-11.16)        | 0                  | -                        | 3                             | 2.29 (0.56-9.37)         | 0                       | -                        |
| <b>Female</b>          |              |                               |                          |                    |                          |                               |                          |                         |                          |
| No lag period          | 22,225       | 4                             | 1.70 (0.63-4.55)         | 10                 | 1.13 (0.36-3.53)         | 5                             | 1.23 (0.30-5.01)         | 2                       | 4.18 (0.02-17.12)        |
| 1 year of lag          | 17,818       | 4                             | 2.06 (0.77-5.53)         | 3                  | 1.38 (0.44-4.31)         | 0                             | -                        | 2                       | 5.11 (0.25-20.93)        |
| 3 year of lag          | 10,702       | 2                             | 1.61 (0.40-6.47)         | 0                  | -                        | 0                             | -                        | 2                       | 8.27 (0.02-33.90)        |
| 5 year of lag          | 5,662        | 2                             | 2.88 (0.72-11.58)        | 0                  | -                        | 0                             | -                        | 1                       | 7.32 (0.01-52.79)        |

HR, hazard ratio. <sup>a</sup>Adjusted fatty liver disease. <sup>b</sup>Adjusted diabetes. <sup>c</sup>Adjusted cirrhosis.

**Table S4.** Baseline characteristics according to history of cholelithiasis and cholecystectomy with medical check-up data

|                        | Total          | No-cholelithiasis | Cholelithiasis | <i>P</i> -value | Non-cholecystectomy | Cholecystectomy | <i>P</i> -value |
|------------------------|----------------|-------------------|----------------|-----------------|---------------------|-----------------|-----------------|
| Total                  | 217,860 (30.9) | 212,134 (97.4)    | 5,726 (2.6)    |                 | 214,476 (98.5)      | 3,384 (1.6)     |                 |
| Age (yr)               | 43.1 ± 13.7    | 43.0 ± 13.7       | 49.3 ± 13.6    | 0.1             | 43 ± 13.7           | 48 ± 13.7       | < 0.01          |
| Sex                    |                |                   |                | 0.61            |                     |                 | 0.6             |
| Male                   | 123,799 (56.8) | 120,564 (56.8)    | 3,235 (56.5)   |                 | 121,891 (56.8)      | 1,908 (56.4)    |                 |
| Female                 | 94,061 (43.2)  | 91,570 (43.2)     | 2,491 (43.5)   |                 | 92,585 (43.2)       | 1,476 (43.6)    |                 |
| Alcohol                |                |                   |                | < 0.01          |                     |                 | < 0.01          |
| Never                  | 109,340 (50.2) | 106,187 (50.9)    | 3,1543 (56.0)  |                 | 107,465 (50.9)      | 1,875 (56.3)    |                 |
| Current                | 105,012 (48.2) | 102,531 (49.1)    | 2,481 (44.0)   |                 | 103,556 (49.1)      | 1,456 (43.7)    |                 |
| Smoking                |                |                   |                | < 0.01          |                     |                 | < 0.01          |
| Never                  | 137,110 (62.9) | 133,387 (64.3)    | 3,723 (66.4)   |                 | 134,899 (64.3)      | 2,211 (66.8)    |                 |
| Past                   | 20,363 (9.4)   | 19,802 (9.5)      | 561 (10.0)     |                 | 20,015 (9.5)        | 348 (10.5)      |                 |
| Current                | 55,751 (25.6)  | 54,426 (26.2)     | 1,325 (23.6)   |                 | 55,000 (26.2)       | 751 (22.7)      |                 |
| BMI                    |                |                   |                | 0.02            |                     |                 | < 0.01          |
| ≥ 25 kg/m <sup>2</sup> | 150,681 (69.2) | 147,217 (69.4)    | 3,464 (60.5)   |                 | 148,695 (69.4)      | 1,986 (58.7)    |                 |
| < 25 kg/m <sup>2</sup> | 67,129 (30.8)  | 64,869 (30.6)     | 2,260 (39.5)   |                 | 65,732 (30.7)       | 1,397 (41.3)    |                 |
| Comorbidity            |                |                   |                |                 |                     |                 |                 |
| Diabetes               | 24,319 (11.2)  | 23,176 (10.9)     | 1,143 (19.9)   | < 0.01          | 23,676 (11.0)       | 645 (19.0)      | < 0.01          |
| Viral hepatitis        | 3,750 (1.7)    | 3,574 (1.7)       | 176 (3.1)      | < 0.01          | 3,670 (1.7)         | 80 (2.4)        | < 0.01          |
| Cirrhosis              | 839 (0.4)      | 750 (0.4)         | 89 (1.6)       | < 0.01          | 815 (0.4)           | 24 (0.7)        | < 0.01          |
| Fatty liver disease    | 9,026 (4.1)    | 8,586 (4.1)       | 440 (7.7)      | < 0.01          | 8,779 (4.1)         | 247 (7.3)       | < 0.01          |
| Clonorchis sinensis    | 51 (0.0)       | 48 (0.0)          | 3 (0.1)        | 0.15            | 49 (0.0)            | 2 (0.1)         | < 0.01          |

Values are presented as number (%) or mean ± SD. BMI, body mass index.

**Table S5.** HR of hepatobiliary and pancreatic cancer in the gallstone and cholecystectomy group with medical check-up data

| Variable        | Lag period    | PY     | Hepatobiliary and pancreatic cancer |                          | Liver cancer |                          | Biliary tract cancer |                          | Pancreatic cancer |                          |
|-----------------|---------------|--------|-------------------------------------|--------------------------|--------------|--------------------------|----------------------|--------------------------|-------------------|--------------------------|
|                 |               |        | Event                               | HR <sup>a</sup> (95% CI) | Event        | HR <sup>a</sup> (95% CI) | Event                | HR <sup>b</sup> (95% CI) | Event             | HR <sup>c</sup> (95% CI) |
| Gallstone       |               |        |                                     |                          |              |                          |                      |                          |                   |                          |
|                 | No lag period | 26,273 | 157                                 | 1.97 (1.61-2.41)         | 82           | 1.86 (1.44-2.41)         | 49                   | 3.04 (1.95-4.74)         | 26                | 1.71 (1.05-2.78)         |
|                 | 1 year of lag | 21,253 | 86                                  | 1.67 (1.31-2.12)         | 54           | 1.61 (1.19-2.18)         | 18                   | 2.61 (1.56-4.40)         | 14                | 1.33 (0.73-2.42)         |
|                 | 3 year of lag | 13,008 | 49                                  | 1.54 (1.13-2.09)         | 31           | 1.63 (0.14-2.36)         | 12                   | 2.42 (1.24-4.70)         | 6                 | 0.76 (0.28-2.04)         |
|                 | 5 year of lag | 7,027  | 24                                  | 1.43 (0.95-2.16)         | 16           | 1.51 (0.92-2.49)         | 5                    | 1.89 (0.70-5.07)         | 3                 | 1.01 (0.32-3.14)         |
| Cholecystectomy |               |        |                                     |                          |              |                          |                      |                          |                   |                          |
|                 | No lag period | 14,805 | 55                                  | 1.52 (1.11-2.10)         | 23           | 1.19 (0.78-1.87)         | 22                   | 3.01 (1.69-5.35)         | 10                | 1.49 (0.74-3.01)         |
|                 | 1 year of lag | 11,808 | 28                                  | 1.19 (0.80-1.76)         | 16           | 1.07 (0.63-1.82)         | 7                    | 2.12 (1.00-4.47)         | 5                 | 0.91 (0.34-2.44)         |
|                 | 3 year of lag | 7,015  | 15                                  | 0.82 (0.46-1.49)         | 11           | 0.96 (0.48-1.93)         | 4                    | 1.45 (0.46-4.51)         | 0                 | -                        |
|                 | 5 year of lag | 3,668  | 4                                   | 0.53 (0.20-1.40)         | 3            | 0.63 (0.20-1.95)         | 1                    | 0.88 (0.12-6.25)         | 0                 | -                        |

HR, hazard ratio; PY, person-year. <sup>a</sup>Adjusted sex, alcohol consumption, cigarette smoking, body mass index (BMI), diabetes, viral hepatitis, cirrhosis, fatty liver disease. <sup>b</sup>Adjusted sex, alcohol consumption, cigarette smoking, BMI, diabetes, cirrhosis, fatty liver disease. <sup>c</sup>Adjusted sex, alcohol consumption, cigarette smoking, BMI, cirrhosis.

**Table S6.** HR of hepatobiliary and pancreatic cancer's subsite in the gallstone and cholecystectomy group with medical check-up data

| Variable        | Lag period    | PY     | Intrahepatic bile duct cancer |                          | Gallbladder cancer |                          | Extrahepatic bile duct cancer |                          | Ampulla of Vater cancer |                          |
|-----------------|---------------|--------|-------------------------------|--------------------------|--------------------|--------------------------|-------------------------------|--------------------------|-------------------------|--------------------------|
|                 |               |        | Event                         | HR <sup>a</sup> (95% CI) | Event              | HR <sup>b</sup> (95% CI) | Event                         | HR <sup>c</sup> (95% CI) | Event                   | HR <sup>d</sup> (95% CI) |
| Gallstone       |               |        |                               |                          |                    |                          |                               |                          |                         |                          |
|                 | No lag period | 26,273 | 9                             | 1.60 (0.71-3.62)         | 30                 | 3.72 (2.01-6.88)         | 12                            | 2.24 (0.91-5.50)         | 4                       | 3.45 (1.07-11.12)        |
|                 | 1 year of lag | 21,253 | 5                             | 1.29 (0.48-3.47)         | 10                 | 3.28 (1.61-6.70)         | 3                             | 1.60 (0.51-5.06)         | 3                       | 4.16 (1.29-13.44)        |
|                 | 3 year of lag | 13,008 | 2                             | 1.00 (0.25-4.02)         | 5                  | 1.89 (0.60-5.93)         | 3                             | 1.67 (0.41-6.77)         | 3                       | 6.55 (0.93-21.17)        |
|                 | 5 year of lag | 7,027  | 2                             | 1.74 (0.43-7.04)         | 1                  | 1.13 (0.16-8.05)         | 1                             | 1.48 (0.21-10.62)        | 2                       | 3.94 (0.54-28.71)        |
| Cholecystectomy |               |        |                               |                          |                    |                          |                               |                          |                         |                          |
|                 | No lag period | 14,805 | 5                             | 2.49 (1.02-6.06)         | 13                 | 2.82 (1.16-6.87)         | 5                             | 3.31 (1.22-8.98)         | 1                       | 2.00 (0.28-14.54)        |
|                 | 1 year of lag | 11,808 | 4                             | 2.43 (0.90-6.56)         | 3                  | 2.04 (0.65-6.41)         | 3                             | 3.01 (0.95-9.48)         | 1                       | 2.45 (0.34-17.83)        |
|                 | 3 year of lag | 7,015  | 4                             | 1.93 (0.48-7.79)         | 1                  | 1.09 (0.15-7.79)         | 2                             | 1.59 (0.22-11.38)        | 1                       | 4.02 (0.55-29.23)        |
|                 | 5 year of lag | 3,668  | 2                             | 3.49 (0.86-14.07)        | 0                  | -                        | 1                             | 2.93 (0.41-20.96)        | 0                       | -                        |

HR, hazard ratio; PY person-year. <sup>a</sup>Adjusted sex, alcohol consumption, cigarette smoking, mass index (BMI), fatty liver disease. <sup>b</sup>Adjusted sex, alcohol consumption, cigarette smoking, BMI, diabetes. <sup>c</sup>Adjusted sex, alcohol consumption, cigarette smoking, BMI, cirrhosis. <sup>d</sup>Adjusted sex, alcohol consumption, cigarette smoking, BMI.

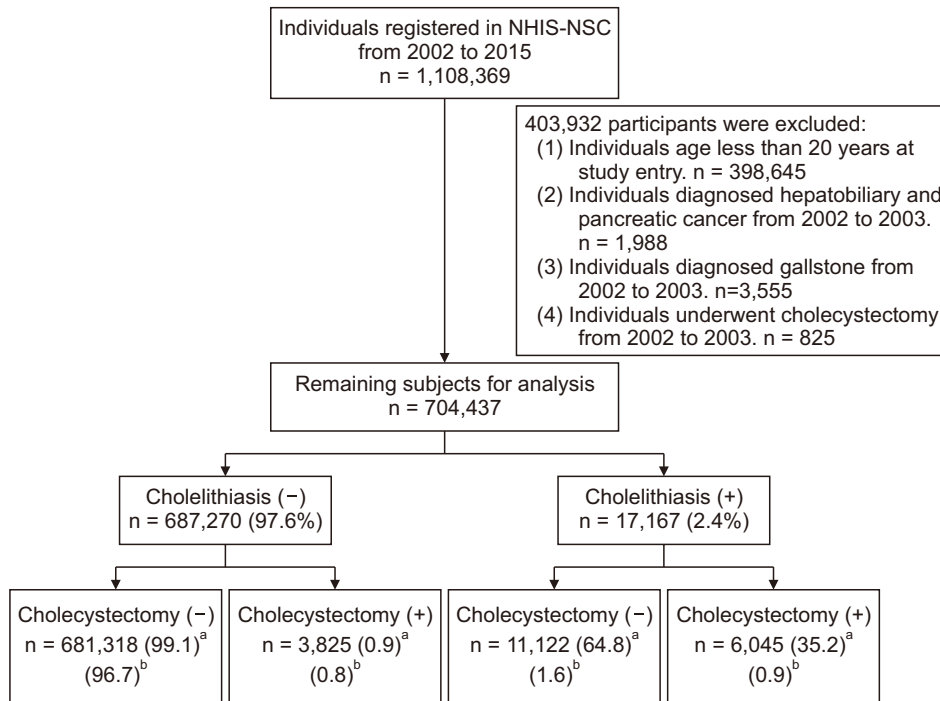

**Figure S1. Selection of the study population.** NHIS-NSC, National Health Insurance Service-National Sample Cohort. <sup>a</sup>Percentage in cholecystectomy group. <sup>b</sup>Percentage in corresponding.

**A**

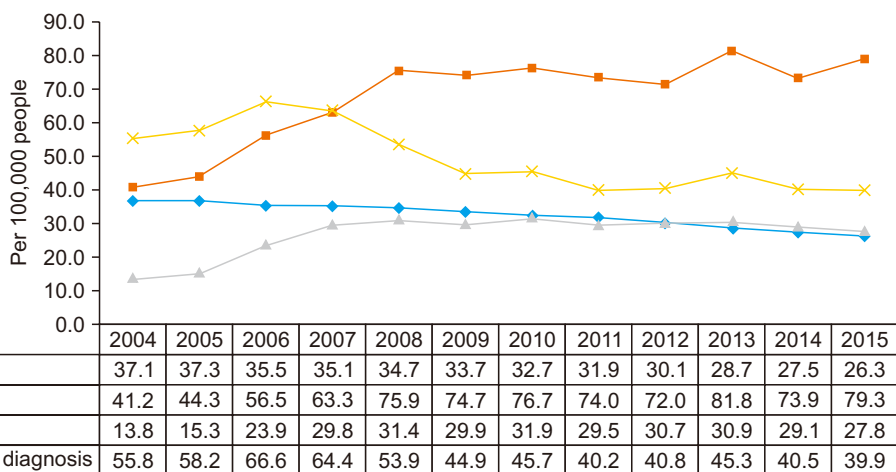

**B**

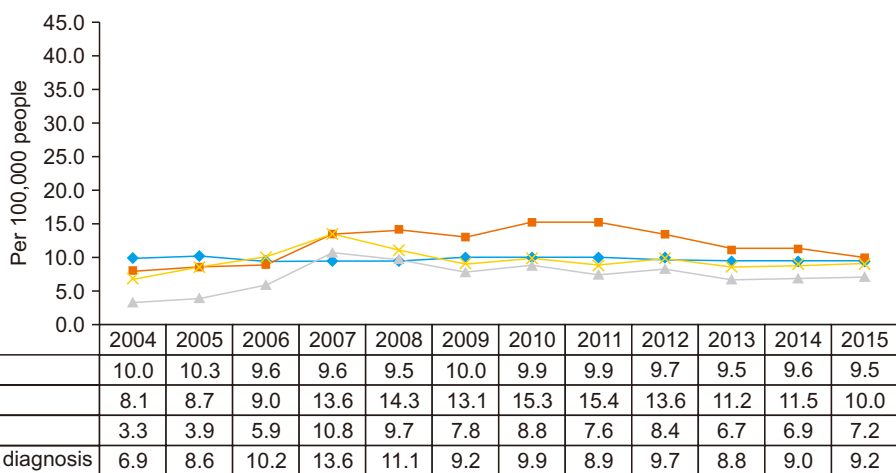

**C**

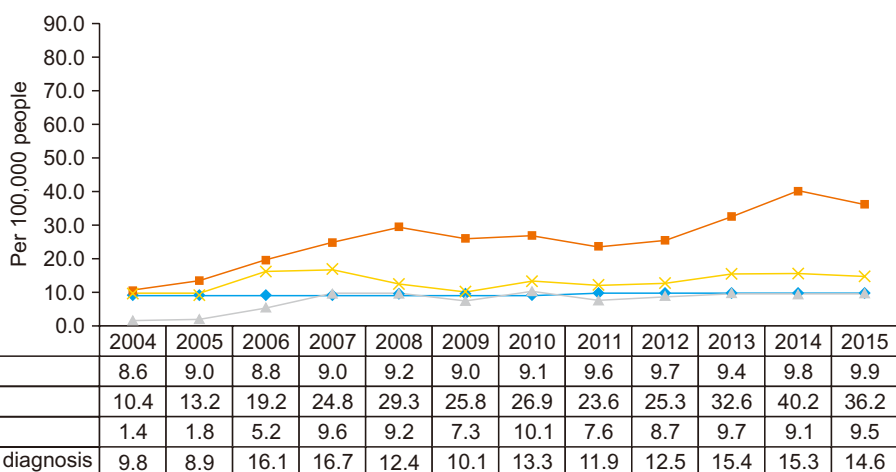

**Figure S2. Truncated age-standardized incidence rate of hepatobiliary and pancreatic cancer among adults aged 20 years and older in the national cancer registry and defined in current study. (A) Liver cancer. (B) Biliary tract cancer. (C) Pancreatic cancer. Standard population: middle-year population of 2010.**
